# Supplementary material for: Quantitative evaluation of muscle mass based on chest high-resolution CT and its prognostic value for tuberculosis: a retrospective study
Source: PeerJ. 2025 Mar 17;13:e19147. doi: 10.7717/peerj.19147 (PMC11925048; doi:10.7717/peerj.19147)
Supplement: Supplemental Information 1 [file peerj-13-19147-s001.xlsx]

## Sheet: Sheet1
id	prognosis	age	sex	weight	height	BMI	Yes/no Alcohol consumption	Yes/no smoke	Educational level	T12SMA	T12SMRA	T12SMI	yes/no cavity	Number of cavities before treatment	Number of cavities after treatment	Number of pulmonary lobes involved by cavity before treatment	Number of pulmonary lobes involved by cavity after treatment	Total lung lesion before treatment	Total pulmonary focus absorption ratio	Sputum smear after treatment
138	1	54	female（female）	34	1.53	14.52	0	0	0	40.35	38.12	17.237	0					57.748	0.277734	3+
174	1	61	female	38	1.62	14.47	0	0	1	49.38	32.98	18.8157	1	7	7	3	3	24.7086	0.219898	2+
50	0	29	female	44.5	1.58	17.82	0	0	1	47.43	42.56	18.9994	1	3	2	2	2	16.704	0.224026	0+
72	1	32	female	32	1.5	14.22	0	0	1	42.76	41.06	19.0044	1	10	8	2	1	15.6695	0.228037	1+
252	1	30	female	39.5	1.55	16.44	0	0	1	45.83	42.6	19.076	0					15.322	0.461527	2+
217	1	75	female	35	1.6	13.67	0	0	0	48.88	32.46	19.0938	1	3	0	1	0	14.3472	0.150599	2+
282	1	71	female	41.5	1.58	16.62	0	0	0	48.61	18.19	19.472	1	13	3	2	2	14.2053	0.398738	3+
258	1	18	female	46	1.56	18.9	0	0	1	47.62	41.61	19.5677	1	10	5	2	2	14.0871	0.398854	2+
157	1	58	female	36	1.54	15.17	0	0	0	47.02	39.46	19.8263	1	4	2	2	1	6.71758	0.269984	1+
225	1	80	female	42	1.63	15.8	0	0	0	52.77	28.12	19.8615	1	8	6	2	2	6.54202	0.690279	3+
220	1	76	male（man）	51	1.65	18.73	1	1	0	54.89	25.89	20.1616	1	12	6	3	2	6.51874	0.365532	2+
150	1	57	female	45	1.62	17.14	0	0	0	53.54	37.43	20.4009	1	7	6	4	4	6.41665	0.499672	2+
297	1	18	male	50	1.8	15.43	0	1	0	67.34	56.5	20.784	1	3	4	2	2	6.32065	0.356062	4+
1	0	18	female	49	1.62	18.67	0	0	1	54.76	41.85	20.8657	0					6.16552	0.218305	0+
212	0	72	female	65	1.68	23.03	0	0	0	59.6	16.62	21.1168	0					6.14703	0.168535	0+
120	0	47	male	45	1.7	15.57	0	0	0	61.52	76.85	21.2872	1	2	1	1	1	6.05759	0.314017	0+
233	1	93	male	59	1.7	20.41	0	0	0	61.56	26.69	21.301	0					6.04713	0.312503	3+
290	0	23	female	45	1.6	17.57	0	0	1	54.65	37.82	21.3477	0					5.82586	0.296653	0+
98	0	37	female	50	1.56	20.54	0	0	0	52.05	49.13	21.3881	1	20	3	2	2	5.81146	0.202153	0+
184	0	65	male	45	1.7	15.57	0	0	1	61.84	31.86	21.3979	0					8.93847	0.317062	0+
2	1	76	male	56	1.72	18.92	0	0	0	63.35	37.48	21.4136	0					8.62034	0.264723	2+
228	0	85	female	60	1.53	25.63	0	0	0	50.83	13.37	21.7139	1	13	10	2	2	8.5896	0.386838	0+
96	0	37	female	45	1.58	18.02	0	0	0	54.49	44.93	21.8274	1	3	3	1	1	8.17845	0.422078	0+
227	0	82	female	37	1.57	15.01	0	0	0	53.92	28.39	21.8751	1	1	0	1		8.09284	0.480461	0+
291	0	25	female	57	1.67	20.43	0	0	0	61.32	41.57	21.9872	0					7.76317	0.119231	0+
195	0	66	female	43	1.55	17.89	0	0	0	52.95	32.47	22.0395	1	3	3	3	3	7.3722	0.278144	0+
74	0	33	male	61	1.91	16.72	0	0	1	80.53	47.07	22.0745	0					6.83047	0.276281	0+
3	0	18	female	50	1.64	18.59	0	0	1	59.92	44.33	22.2784	1	7	8	2	2	3.05494	0.292055	0+
143	0	55	male	52.5	1.75	17.14	0	1	1	68.67	37.72	22.4229	0					3.02703	0.446065	0+
64	0	31	female	45	1.56	18.49	0	0	1	54.65	45.79	22.4564	0					2.82324	0.12619	0+
148	1	56	male	42.5	1.63	15.99	0	1	1	60.49	52.89	22.7671	0					2.78931	0.0813047	2+
27	0	25	female	37	1.58	14.82	0	0	1	56.89	51.45	22.7888	1	4	2	2	2	2.77432	0.198279	0+
40	0	28	male	52	1.78	16.41	0	1	0	73.63	54.67	23.2389	0					2.75833	0.191927	0+
80	0	34	female	60	1.7	20.26	0	0	1	67.72	34.93	23.4325	1	4	5	1	1	2.73573	0.201304	0+
94	0	37	female	54	1.63	20.32	1	0	0	62.44	37.16	23.5011	0					2.69561	0.151259	0+
112	0	44	female	60	1.65	22.03	1	0	0	64.02	34.68	23.5152	1	3	2	2	1	2.68809	0.546088	0+
193	0	66	female	45	1.65	16.52	0	0	0	64.02	27.9	23.5152	1	2	1	1	1	2.68294	0.16174	0+
91	0	35	male	52	1.74	17.17	0	1	1	71.21	40.78	23.5203	1	1	2	1	1	2.61109	0.213568	0+
299	0	39	male	55	1.8	16.97	0	0	0	76.32	47.96	23.5556	1	8	3	2	2	5.06671	0.745408	0+
306	1	43	female	44	1.5	19.55	0	0	0	53.09	26.54	23.5956	1	2	0	1	0	4.83485	0.357517	3+
210	0	71	female	55	1.63	20.7	0	0	0	62.76	34.3	23.6215	0					4.45496	0.460825	0+
173	0	61	male	45	1.7	15.57	0	0	0	68.32	35.93	23.6401	0					4.41784	0.158743	0+
118	0	46	female	44	1.64	16.35	0	0	1	64.02	38.8	23.8028	1	5	2	1	1	4.3868	0.20534	0+
242	0	29	male	48	1.75	15.67	0	1	1	73.1	55.05	23.8694	1	1	1	2	2	4.34475	0.168634	0+
176	0	62	female	53	1.58	21.23	0	0	0	59.97	34.57	24.0226	1	4	0	1	0	4.23836	0.373781	0+
164	1	59	male	45	1.65	16.52	0	0	0	65.45	45.73	24.0404	0					4.2113	0.406461	1+
62	0	31	female	56	1.6	21.87	0	0	0	61.82	45.33	24.1484	0					4.06233	0.406488	0+
41	0	28	female	40	1.52	17.31	0	0	1	55.8	54.06	24.1517	1	1	1	1	1	4.03682	0.151225	0+
288	1	28	male	55	1.8	16.97	0	0	1	78.51	47.93	24.2315	0					4.02619	0.441854	2+
234	0	20	female	48	1.5	21.33	0	0	0	54.88	42.85	24.3911	1	8	4	3	3	3.99137	0.0768087	0+
295	0	19	female	50	1.6	19.53	0	0	1	62.52	46.95	24.4219	0					3.94394	0.481906	0+
216	1	75	male	55	1.78	17.35	0	1	0	77.39	48.13	24.4256	0					3.7925	0.0352005	3+
253	0	18	female	56.5	1.65	20.75	0	0	1	66.56	46.05	24.4481	1	5	4	3	3	3.72075	0.238022	0+
39	0	27	female	45	1.55	18.73	0	0	1	58.89	38.8	24.512	0					3.66327	0.45299	0+
76	0	33	female	48	1.6	18.74	0	0	0	62.87	42.44	24.5586	1	3	4	1	1	3.64205	0.0732609	0+
293	0	61	male	55	1.75	17.95	0	0	1	75.24	43.87	24.5682	1	1	1	1	1	3.40528	0.161283	0+
23	0	24	female	46	1.6	17.96	0	0	1	62.9	42.88	24.5703	0					3.31476	0.124766	0+
279	0	67	female	54	1.6	21.09	0	0	0	62.96	36.89	24.5938	0					3.22858	0.750025	0+
8	0	19	female	43	1.58	17.22	0	0	1	61.58	45.22	24.6675	0					3.20495	0.136285	0+
42	0	28	female	51	1.65	18.73	0	0	1	67.18	44.64	24.6758	0					3.16573	0.229804	0+
131	0	50	female	51	1.6	19.92	0	0	0	63.18	46.05	24.6797	0					3.13449	0.188776	0+
307	0	53	female	50	1.52	21.64	0	0	0	57.22	28.61	24.7663	0					3.07656	0.346969	0+
49	0	29	female	52	1.6	20.31	0	0	1	64.02	47.6	25.0078	0					3.05893	0.294184	0+
302	0	44	female	51	1.6	19.92	0	0	0	64.21	32.11	25.082	0					14.04	0.821198	0+
163	0	58	female	45	1.6	17.57	0	0	0	64.22	67.49	25.0859	0					12.8429	0.762469	0+
268	0	26	female	54	1.6	21.09	0	0	1	64.39	42.94	25.1523	0					12.6462	0.750336	0+
269	0	33	female	48	1.6	18.74	0	0	1	64.49	41.33	25.1914	0					12.5993	0.696094	0+
31	0	26	male	48	1.7	16.6	0	0	0	72.81	48.76	25.1938	0					12.5202	0.636372	0+
183	1	64	male	67	1.73	22.38	0	1	1	75.45	42.91	25.2097	1	9	5	1	1	12.489	0.748191	2+
274	0	21	male	47	1.65	17.26	0	0	1	68.72	54.76	25.2415	1	1	1	1	1	10.5765	0.797632	0+
224	0	79	male	49	1.65	17.99	0	0	0	68.76	38.3	25.2562	1	3	2	3	2	10.1509	0.761727	0+
261	0	49	female	50	1.56	20.54	0	0	0	61.5	40.33	25.2712	1	6	1	2	1	10.1441	0.75137	0+
248	0	38	male	54	1.7	18.68	0	1	1	73.24	46.04	25.3426	1	4	0	1	0	10.0103	0.790552	0+
187	1	65	male	55	1.6	21.48	1	1	0	65.18	44.9	25.4609	0					9.23802	0.667404	1+
108	0	42	male	49	1.7	16.95	0	0	0	73.67	47.17	25.4913	1	1	0	1	0	2.58581	0.441666	0+
53	0	29	male	48	1.72	16.22	0	0	1	75.48	46.59	25.5138	1	1	1	1	1	2.5705	0.353972	0+
245	0	40	female	42	1.51	18.42	0	0	1	58.22	45.45	25.534	1	1	1	1	1	2.55051	0.170275	0+
272	0	25	female	55	1.62	20.95	0	0	1	67.32	43.88	25.6516	1	1	0	1	0	2.55051	0.123923	0+
70	0	32	male	55	1.78	17.35	0	0	1	81.6	46.44	25.7543	1	4	2	2	2	2.44999	0.412445	0+
19	0	24	female	50	1.58	20.02	0	0	1	64.34	47.18	25.7731	1	3	2	1	1	2.43012	0.0154511	0+
130	0	50	male	49	1.68	17.36	0	0	0	72.76	43.49	25.7795	0					2.42259	0.656163	0+
285	1	77	female	45	1.58	18.02	0	0	0	64.37	28.84	25.7851	0					2.40379	0.184253	3+
128	1	49	female	56	1.58	22.43	0	0	0	64.54	38.25	25.8532	0					2.34369	0.660555	2+
115	0	46	female	46	1.5	20.44	0	0	0	58.19	35.14	25.8622	1	5	3	1	1	2.34125	0.222025	0+
270	0	37	male	52	1.72	17.57	0	0	1	76.56	45.54	25.8789	0					0.889578	0.322544	0+
298	0	51	female	52	1.6	20.31	0	0	0	66.29	30.85	25.8945	0					0.884294	0.645638	0+
101	1	38	female	45	1.53	19.22	0	0	0	60.72	39.71	25.9387	1	4	3	0	2	0.853034	0.0354476	2+
226	0	80	male	44	1.65	16.16	1	0	0	70.7	39.5	25.9688	1	1	1	1	1	0.847182	0.0867063	0+
203	1	69	male	49	1.67	17.56	0	0	0	72.51	41.43	25.9995	0					0.846084	0.61713	3+
259	1	57	male	62	1.72	20.95	1	0	1	77.14	33	26.0749	0					0.8459	0.0192623	1+
44	0	28	male	71	1.88	20.08	0	0	1	92.32	45.32	26.1204	0					0.806046	0.248271	0+
240	0	59	male	61	1.69	21.35	0	0	0	74.61	37.83	26.123	0					0.804308	0.573096	0+
206	0	70	female	41	1.5	18.22	0	0	0	58.86	32.57	26.16	1	3	1	2	1	0.784474	0.413681	0+
308	1	60	male	50	1.7	17.3	0	0	0	76.07	38.04	26.3218	1	1	1	1	1	0.764782	0.0252647	2+
300	0	43	female	48	1.53	20.07	0	0	0	61.86	42.33	26.4257	0					0.757648	0.109534	0+
69	1	32	male	50	1.7	17.3	0	0	1	76.44	45.02	26.4498	0					0.74587	0.0243367	3+
260	0	50	male	63	1.71	21.54	0	0	1	77.37	42.61	26.4594	0					0.732226	0.401218	0+
95	0	37	male	48.5	1.7	16.78	1	1	0	76.61	53.85	26.5087	1	1	1	1	1	0.703554	0.0634294	0+
305	0	56	male	50	1.67	17.92	1	1	0	74.19	34.1	26.6019	1	3	0	1	0	1.71248	0.575783	0+
281	1	48	male	50	1.68	17.71	1	0	0	75.3	51.25	26.6794	0					1.71155	0.551969	1+
273	0	26	male	50	1.66	18.14	0	0	1	73.53	57.81	26.6838	0					1.70747	0.774247	0+
309	0	18	female	60.2	1.6	23.51	0	0	1	68.44	34.22	26.7344	0					1.65825	0.276231	0+
196	0	66	male	50	1.65	18.36	0	0	0	72.97	43.99	26.8026			1		1	1.64213	0.491841	0+
189	0	65	female	60	1.62	22.86	0	0	0	70.36	35.28	26.8099	1	1	0	1	0	0.212098	0.604834	0+
105	0	41	female	52	1.62	19.81	0	0	0	70.42	44.31	26.8328	0					0.207692	0.621536	0+
116	1	46	female	53	1.6	20.7	0	0	1	68.84	42.7	26.8906	0					0.203062	0.754893	2+
9	0	20	male	47	1.7	16.26	0	0	1	77.87	48.07	26.9446	1	4	2	1	1	0.201664	0.173824	0+
13	0	22	male	41	1.6	16.01	0	0	0	69.2	45.28	27.0312	1	1	1	0	1	19.818	0.349309	0+
121	0	47	male	49	1.6	19.14	1	1	1	69.24	47.72	27.0469	0					19.5982	0.874601	0+
231	0	58	male	57	1.68	20.19	1	1	1	76.36	46.05	27.055	0					19.4896	0.774977	0+
43	0	28	female	48	1.62	18.28	0	0	1	71.41	45.69	27.21	0					18.6122	0.90791	0+
68	1	32	male	64	1.8	19.75	0	1	1	88.28	49.37	27.2469	0					18.5892	0.830504	3+
133	0	51	female	60.5	1.58	24.23	0	0	0	68.04	34.83	27.2552	0					18.4264	0.669604	0+
235	1	32	male	68	1.8	20.98	0	1	0	88.59	49.72	27.3426	0					0.374376	0.0750743	2+
230	0	54	male	54	1.7	18.68	0	1	0	79.45	42.55	27.4913	0					0.172246	0.0652671	0+
84	0	35	female	55	1.63	20.7	0	0	1	73.33	43.84	27.5998	0					0.37165	0.454282	0+
77	0	33	female	43	1.52	18.61	0	0	1	63.9	40.51	27.6575	1	1	0	1	0	0.164714	0.825661	0+
207	1	70	male	60	1.78	18.93	1	1	0	87.9	41.28	27.7427	1	1	1	1	1	0.16232	0.744308	1+
198	0	67	male	50	1.72	16.9	1	0	0	82.23	49.88	27.7954	1	3	2	2	2	0.158234	0.86003	0+
219	0	75	female	60	1.58	24.03	0	0	0	69.6	18.65	27.8801	0					1.74728	0.91236	0+
22	0	24	male	57	1.8	17.59	0	0	1	90.75	48.33	28.0093	0					1.47162	0.401761	0+
38	0	27	male	52	1.78	16.41	0	0	1	88.76	54.05	28.0141	0					1.45712	0.599374	0+
34	0	27	female	50	1.63	18.81	0	0	1	74.44	43.93	28.0176	0					1.44802	0.903896	0+
271	1	41	male	55	1.72	18.59	0	0	0	82.96	45.02	28.0422	0					1.39872	0.801805	2+
167	0	60	male	57	1.68	20.19	1	1	0	79.29	46.62	28.0931	1	8	2	2	2	1.39486	0.67558	0+
182	1	64	male	59	1.68	20.9	0	0	0	79.31	32.63	28.1002	1	2	1	1	1	1.37766	0.926876	3+
204	1	70	male	58	1.7	20.54	0	0	0	81.45	36.69	28.1834	1	1	1	1	1	1.33098	0.781665	2+
79	0	33	male	63	1.75	20.57	0	0	1	86.34	42.74	28.1927	1	1	1	1	1	1.30342	0.426678	0+
214	1	73	male	65	1.78	20.51	0	1	0	89.48	39.08	28.2414	0					1.2991	0.737033	1+
255	1	75	male	41	1.58	16.42	0	0	0	70.52	45.97	28.2487	0					3.28714	0.903868	2+
114	0	46	male	56	1.65	20.56	0	0	0	76.92	36.4	28.2534	0					1.28146	0.881073	0+
83	0	34	male	51	1.7	17.64	0	1	1	81.82	51.19	28.3114	0					3.28064	0.936698	0+
145	1	56	male	45	1.6	17.57	0	0	0	72.53	47.85	28.332	0					1.24412	0.865624	2+
222	0	76	female	49.5	1.55	20.6	0	0	0	68.16	27.53	28.3704	1	3	2	2	2	2.23565	0.992174	0+
251	0	45	female	48.5	1.58	19.42	0	0	1	70.85	42.45	28.3809	0					2.17232	0.948349	0+
218	0	75	male	42	1.58	16.82	0	0	0	70.92	40.36	28.4089	0					2.13543	0.939829	0+
117	0	46	male	58	1.7	20.06	0	0	0	82.51	44.06	28.5502	0					2.12238	0.935439	0+
104	0	40	female	54	1.58	21.63	0	0	0	71.34	42.05	28.5772	0					2.09577	0.978943	0+
277	0	39	female	54	1.64	20.07	0	0	0	76.97	46.43	28.6176	0					2.04699	0.492798	0+
2	0	18	female	51.5	1.57	20.89	0	0	1	70.6	47.34	28.6421	0					2.02067	0.946033	0+
7	0	19	male	55	1.73	18.37	0	0	1	85.93	52.89	28.7113	1	1	1	1	1	2.01373	0.905641	0+
137	0	54	male	57	1.7	19.72	1	0	0	83.01	49.79	28.7232	1	1	1	1	1	1.76871	0.786853	0+
208	1	70	male	69	1.77	22.02	1	1	0	90.12	29.02	28.7657	0					1.76861	0.922379	3+
33	0	27	male	57	1.81	17.39	0	0	1	94.33	53.73	28.7934	0					1.75344	0.909157	0+
191	0	65	male	60	1.7	20.76	0	0	0	83.47	45.87	28.8824	0					1.71464	0.852812	0+
289	0	65	male	57	1.69	19.95	1	0	0	82.5	44.73	28.8855	0					0.690084	0.118125	0+
75	0	33	male	63	1.85	18.4	0	1	0	99.16	50.14	28.973	0					0.68995	0.996061	0+
276	0	18	female	56	1.63	21.07	0	0	1	77	46.32	28.9811	0					0.688176	0.943977	0+
5	0	19	male	62	1.7	21.15	0	0	1	83.81	48.88	29	0					0.680442	0.972853	0+
286	0	74	male	52	1.65	19.1	0	0	0	78.99	41.49	29.0138	0					1.87616	0.79258	0+
201	0	69	female	61	1.59	24.12	0	0	0	73.51	34.5	29.0772	0					2.6715	0.64247	0+
188	0	65	male	62	1.72	20.95	0	1	0	86.05	42.71	29.0867	0					6.70054	0.810744	0+
85	0	35	male	54	1.69	18.9	0	0	1	83.24	42.59	29.1446	0					6.48698	0.422391	0+
278	0	39	male	65	1.78	20.51	0	0	1	92.45	48.49	29.1788	1	2	1	1	1	6.47502	0.753746	0+
88	0	35	male	60	1.65	22.03	0	0	1	79.46	51.67	29.1864	1	1	1	1	1	6.38036	0.562623	0+
250	0	40	male	68	1.78	21.46	0	0	0	92.5	47.55	29.1945	0					6.24732	0.917176	0+
56	0	29	male	49.5	1.68	17.53	0	0	1	82.51	48.05	29.234	0					5.67188	0.434484	0+
60	0	31	male	54	1.73	18.04	0	1	1	87.56	47.25	29.2559	0					5.65932	0.451369	0+
144	0	55	male	67	1.8	20.67	0	1	0	95.04	51.31	29.3333	0					5.48548	0.980563	0+
283	0	56	female	52	1.5	23.11	0	0	0	66	27.77	29.3333	1	1	1	1	1	5.39384	0.961845	0+
246	0	54	male	52	1.65	19.1	0	0	1	79.92	41.84	29.3554	0					2.53572	0.969488	0+
16	0	23	male	66	1.83	19.7	0	0	0	98.4	47.76	29.3828	1	3	2	2	1	4.53433	0.529167	0+
238	0	37	male	55	1.72	18.59	0	1	0	87.05	44.88	29.4247			2		1	0.531558	0.930384	0+
190	0	65	male	61	1.62	23.24	0	0	0	77.27	36.25	29.4429	0					0.530922	0.983061	0+
67	0	32	male	74	1.8	22.83	0	1	0	95.61	31.04	29.5093	0					0.51776	0.935151	0+
141	0	55	male	53	1.68	18.77	1	0	0	83.52	40.57	29.5918	0					0.517588	0.95292	0+
159	0	58	male	64	1.7	22.14	0	1	0	85.96	54.12	29.7439	0					0.508324	0.919533	0+
52	0	29	male	55	1.71	18.8	0	0	1	87.5	49.5	29.9237	1	2	2	1	1	0.505856	0.331308	0+
106	0	42	female	62	1.62	23.62	0	0	0	78.59	45.41	29.9459	0					0.47154	0.991202	0+
296	0	23	male	65	1.81	19.84	0	0	1	98.26	51.54	29.993	0					6.47051	0.665574	0+
244	0	37	male	50	1.69	17.5	0	0	1	85.84	47.93	30.055	0					0.46955	0.714028	0+
36	1	27	male	71	1.68	25.15	0	0	0	84.95	47.3	30.0985	0					0.45714	0.925051	2+
171	0	60	male	50	1.65	18.36	0	0	0	81.99	46.88	30.1157	1		1		1	6.456	0.99464	0+
237	0	30	male	67	1.75	21.87	1	1	1	92.23	47.03	30.1159	0					6.44409	0.898124	0+
37	0	27	male	56	1.7	19.37	0	0	1	87.37	54.45	30.2318	0					6.44155	0.902925	0+
46	0	28	male	60	1.67	22.2	0	0	1	84.54	50.35	30.313	0					0.427396	0.879713	0+
236	0	56	male	65	1.74	21.22	1	0	0	91.79	40.71	30.3177	0					0.426728	0.928038	0+
18	0	24	male	71.5	1.83	21.35	0	0	1	101.6	45.93	30.3383	0					4.42625	0.693865	0+
65	0	31	female	53	1.59	20.96	0	0	1	76.75	41.74	30.3588	0					4.42308	0.846864	0+
265	0	55	female	52	1.52	22.72	0	0	0	70.18	46.86	30.3757	1	1	1	1	1	0.416174	0.970759	0+
122	0	47	male	52.5	1.67	18.82	0	0	1	84.82	48.75	30.4134	1	1	1	1	1	4.41536	0.891358	0+
181	1	64	male	62	1.71	21.2	0	1	0	89.36	40.76	30.5598	1	2	2	1	1	4.4063	0.877537	1+
26	0	25	male	70	1.8	21.6	0	0	1	99.06	49.53	30.5741	0					0.39112	0.960742	0+
81	0	34	male	55	1.71	18.8	0	0	1	89.45	49.2	30.5906	1	1	0	1	0	0.390536	0.844911	0+
263	0	19	male	72	1.91	19.73	0	0	1	111.6	54.01	30.5913	0					0.381654	0.93884	0+
55	0	29	male	55	1.67	19.72	0	0	1	85.41	49.23	30.625	0					0.378372	0.964032	0+
243	0	72	male	57.5	1.69	20.13	1	1	0	87.7	44.4	30.7062	0					0.36419	0.889931	0+
32	0	26	male	66	1.73	22.05	0	0	1	91.92	44.29	30.7127	1	1	0	1	0	0.359154	0.735339	0+
25	1	25	male	46	1.62	17.52	0	0	1	80.67	51.57	30.7385	0					4.09102	0.959822	2+
257	0	29	male	66	1.75	21.55	0	0	1	95.08	38.08	31.0465	0					0.090806	0.530472	0+
284	0	22	male	62	1.78	19.56	0	0	1	98.37	52.93	31.0472	1	2	2	1	1	4.08789	0.998148	0+
147	0	56	male	60	1.68	20.76	1	0	1	87.82	41.39	31.1154	0					4.08121	0.974227	0+
304	0	34	male	60	1.7	20.76	1	1	1	90.18	45.09	31.2042	1	2	0	1		7.452	0.936946	0+
97	0	37	male	53	1.64	19.7	1	1	0	84	35.4	31.2314	0					7.3372	0.886169	0+
280	0	29	male	69	1.83	20.6	0	0	1	104.6	48.82	31.2341	0					7.2106	0.0604943	0+
113	1	46	male	70	1.8	21.6	0	1	1	101.4	51	31.2963	0					7.1506	0.640506	3+
166	0	60	male	52.5	1.68	18.6	0	0	1	88.35	42.41	31.3031	0					6.7938	0.943183	0+
158	0	58	male	60	1.73	20.04	1	1	0	94.16	38.14	31.4611	0					6.3878	0.943207	0+
194	0	66	male	52.5	1.65	19.28	1	0	0	85.82	48.42	31.5225	1	1	1	0	1	5.918	0.957817	0+
303	0	45	female	66	1.58	26.43	0	0	0	78.77	39.39	31.5534	0					4.05701	0.927199	0+
266	0	69	male	62	1.7	21.45	1	1	0	91.33	45.43	31.6021	0					5.2106	0.97342	0+
29	0	25	male	60	1.72	20.28	0	0	1	93.51	48.19	31.6083	0					4.6254	0.97915	0+
125	0	49	female	54	1.55	22.47	0	0	0	75.97	44.1	31.6212	0					4.5052	0.932434	0+
156	0	58	male	50	1.65	18.36	1	1	0	86.11	59.82	31.629	0					20.4169	0.979429	0+
30	0	25	male	63	1.77	20.1	0	0	1	99.25	70.32	31.6799	0					0.39476	0.974481	0+
71	0	32	male	65	1.8	20.06	0	0	1	102.7	46.39	31.6975	0					0.3811	0.960577	0+
205	0	70	male	60	1.65	22.03	0	1	0	86.34	38.52	31.7135	0					2.03546	0.981842	0+
35	0	27	male	51	1.7	17.64	0	0	1	91.88	47.96	31.7924	0					0.03251	0.75183	0+
178	0	64	male	72	1.73	24.05	1	1	1	95.2	39.35	31.8086	0					0.032194	0.974306	0+
99	0	38	female	69	1.6	26.95	0	0	0	81.5	34.54	31.8359	0					0.031396	0.797936	0+
24	0	24	male	92	1.83	27.47	0	0	1	106.7	40.73	31.8612	0					0.24528	0.895719	0+
249	0	30	male	50	1.65	18.36	0	0	1	86.95	49.9	31.9376	0					0.234488	0.879013	0+
177	0	63	male	48	1.62	18.28	1	1	0	83.89	40.95	31.9654	0					0.232492	0.9502	0+
262	0	31	male	50	1.6	19.53	0	1	1	82.06	50.33	32.0547	0					0.231038	0.644119	0+
275	0	71	male	58	1.64	21.56	1	1	0	86.27	39.59	32.0754	0					0.228434	0.968647	0+
48	0	29	male	65	1.73	21.71	0	0	1	96.16	45.42	32.1294	1	3	1	1	1	4.22797	0.93847	0+
152	0	57	male	61	1.73	20.28	0	0	0	96.23	36.91	32.1528	0					0.22479	0.96442	0+
134	0	52	male	65	1.72	21.97	1	1	0	95.34	41.47	32.2269	0					2.22094	0.797617	0+
51	0	29	male	55	1.68	19.48	0	0	1	91.08	53.36	32.2704	1	1	0	1	0	0.213838	0.810735	0+
179	0	64	male	80	1.73	26.72	0	0	1	96.79	40.45	32.3399	0					1.57712	0.887578	0+
63	0	31	male	70	1.74	23.12	0	1	1	97.99	43.32	32.3656	1	1	1	1	1	1.54009	0.942223	0+
139	0	54	male	71	1.73	23.72	0	0	0	96.95	34.35	32.3933	0					1.53253	0.922726	0+
58	0	30	male	60	1.73	20.04	0	0	0	97.14	47.4	32.4568	0					1.49162	0.685744	0+
186	0	65	male	63	1.72	21.29	0	0	0	96.18	41.03	32.5108	0					1.49035	0.918804	0+
89	0	35	female	50	1.45	23.78	0	0	0	68.38	35.78	32.5232	0					1.45528	0.819693	0+
146	0	56	male	68	1.67	24.38	0	1	0	90.71	29.01	32.5254	1	1	1	0	1	1.42609	0.440282	0+
292	0	77	male	60	1.65	22.03	1	1	0	88.88	31.08	32.6465	0					1.37132	0.848758	0+
20	0	24	male	65	1.7	22.49	0	1	1	94.63	50.55	32.7439	0					1.35472	0.954083	0+
254	0	27	male				0	1	1	85.05	47.88	33	0					1.35045	0.809826	0+
17	0	23	male	62	1.79	19.35	0	1	1	105.8	56.62	33.0202	1	1	0	0	0	1.32025	0.934625	0+
124	0	49	male	73	1.75	23.83	0	0	0	101.6	42.95	33.1755	0					1.29413	0.681384	0+
161	1	58	male	64	1.7	22.14	1	1	0	96.02	41.96	33.2249	0					1.27873	0.24567	1+
172	0	61	male	65	1.75	21.22	0	1	0	101.9	44.92	33.2735	0					1.25236	0.63	0+
223	0	79	female	53	1.55	22.06	0	0	0	80.06	24.98	33.3236	1	2	0	1	0	1.20715	0.932085	0+
92	0	36	male	63	1.74	20.8	1	0	0	101	44.83	33.3598	0					3.14105	0.963268	0+
232	0	62	female	65	1.63	24.46	0	0	0	88.84	34.71	33.4375	0					3.11897	0.94147	0+
109	0	42	male	70	1.73	23.38	0	0	0	100.1	46.2	33.4458	0					1.07663	0.800767	0+
267	0	66	female	60	1.55	24.97	0	0	0	80.46	26.88	33.4901	1	3	0	1	0	1.06322	0.929018	0+
175	0	62	male	65	1.65	23.87	1	0	0	91.18	38.84	33.4913	0					1.03437	0.922784	0+
170	0	60	male	65	1.7	22.49	1	0	0	97.04	37.86	33.5779	0					1.03316	0.299626	0+
73	0	32	male	62	1.73	20.71	1	0	1	100.7	46.46	33.6463	0					0.992516	0.827763	0+
28	0	25	male	65	1.78	20.51	0	0	1	106.7	45.45	33.6763	0					0.976096	0.930662	0+
47	0	29	female	60	1.6	23.43	0	0	1	86.4	44.1	33.75	0					0.963284	0.803993	0+
168	0	60	male	55	1.7	19.03	0	0	0	97.64	47.84	33.7855	1	1	0	1	0	2.93472	0.561971	0+
264	0	51	male	71	1.71	24.28	0	1	0	98.93	43.96	33.8326	0					9.17928	0.851781	0+
185	0	65	male	60	1.67	21.51	0	0	1	94.93	39.46	34.0385	0					9.01292	0.902907	0+
127	0	49	male	52	1.56	21.36	0	0	0	82.89	39.88	34.0607	0					8.91342	0.940721	0+
213	0	73	male	64	1.65	23.5	0	0	0	93.08	40.66	34.1892	0					2.32191	0.957391	0+
160	0	58	male	56	1.6	21.87	0	0	0	88.06	54.29	34.3984	1	3	3	1	1	2.28688	0.860209	0+
241	0	32	male	62	1.75	20.24	0	0	1	105.4	62.18	34.4163	0					0.123404	0.925479	0+
149	0	56	male	50	1.5	22.22	1	0	1	77.63	54.59	34.5022	0					0.1212	0.971584	0+
215	0	75	male	60	1.61	23.14	0	0	0	89.63	34.77	34.5781	1	1	1	1	1	2.11902	0.932608	0+
102	0	39	male	70	1.72	23.66	0	0	0	102.3	42.94	34.5795	0					0.115462	0.939611	0+
211	0	71	male	68	1.76	21.95	1	1	0	107.2	33.91	34.6074	0					0.110644	0.950244	0+
153	0	57	male	68	1.69	23.8	0	1	1	98.96	43.15	34.6486	0					2.10253	0.838586	0+
61	0	31	male	79	1.75	25.79	1	0	1	106.5	44.33	34.7755	0					10.111	0.942465	0+
180	0	64	male	53	1.7	18.33	1	1	0	100.7	38.83	34.8443	0					9.9442	0.820679	0+
93	0	36	male	53	1.68	18.77	1	0	0	98.5	76.94	34.8994	0					9.8098	0.804257	0+
82	0	34	female	53	1.5	23.55	0	0	0	78.53	41.27	34.9022	0					9.6106	0.884815	0+
239	0	65	male	68	1.72	22.98	0	1	0	103.8	39.42	35.0865	0					9.3372	0.946237	0+
197	0	67	male	64	1.65	23.5	0	0	0	95.75	27.74	35.1699	0					9.203	0.95217	0+
100	0	38	male	51	1.55	21.22	1	1	0	84.9	43.01	35.3382	0					35.8504	0.787896	0+
209	0	71	female	65	1.55	27.05	0	0	0	85.36	29.06	35.5297	0					35.2604	0.938899	0+
11	1	21	male	62.5	1.7	21.62	0	0	1	102.7	51.76	35.5363	0					2.34741	0.97257	3+
123	0	48	male	56	1.68	19.84	1	1	0	100.7	54.69	35.6789	1	1	0	1	0	2.34296	0.96757	0+
229	0	86	male	47	1.61	18.13	0	1	0	92.81	51.59	35.8049	0					0.340562	0.845156	0+
86	0	35	male	88	1.88	24.89	0	1	1	126.9	49.09	35.9043	0					0.335484	0.981424	0+
4	0	19	male	66	1.74	21.79	0	0	1	108.8	54.31	35.9361	0					2.3338	0.868686	0+
200	1	68	male	50	1.58	20.02	0	0	0	90	43.5	36.0519	0					2.32932	0.989542	2+
155	0	58	male	63	1.68	22.32	1	1	0	101.9	39.29	36.104	0					0.326762	0.952435	0+
12	0	22	male	61	1.68	21.61	0	0	1	102.3	51.95	36.2457	0					0.318006	0.950266	0+
151	0	57	female	50	1.5	22.22	0	0	0	81.59	35.22	36.2622	0					2.3173	0.963109	0+
294	0	19	male	64	1.71	21.88	0	0	1	106.2	59.12	36.3189	0					0.317192	0.84586	0+
57	0	30	male	55	1.7	19.03	0	0	0	105.1	48.71	36.3668	0					2.31615	0.811745	0+
136	0	53	male	64	1.69	22.4	0	0	0	104.1	56.47	36.4483	0					2.3119	0.974705	0+
90	0	35	male	75	1.75	24.48	0	0	0	111.7	46.23	36.4735	0					0.301978	0.941875	0+
129	0	50	male	44	1.55	18.31	0	0	0	87.78	49.81	36.5369	0					0.296916	0.997986	0+
45	0	28	male	62.5	1.7	21.62	0	1	1	105.8	46.7	36.609	0					2.27164	0.818931	0+
256	0	37	male	78	1.78	24.61	0	0	1	116.5	51.2	36.7693	1	1	0	1	0	2.26767	0.978691	0+
21	0	24	male	80	1.76	25.82	0	0	1	113.9	47.78	36.7704	0					0.248136	0.991771	0+
192	0	65	male	69	1.67	24.74	1	0	0	103.6	42.83	37.1473	0					0.24813	0.971447	0+
14	0	22	male	60	1.75	19.59	0	0	1	114	55.55	37.2245	0					0.24773	0.966367	0+
119	0	47	male	54	1.7	18.68	0	0	0	107.6	48.7	37.2318	0					0.246812	0.949414	0+
135	0	53	male	75	1.74	24.77	1	1	0	113.3	35.54	37.4224	0					2.02782	0.982946	0+
162	0	58	male	65	1.65	23.87	0	0	0	102.3	37.81	37.5758	0					0.027334	0.986025	0+
103	0	40	male	89	1.7	30.79	0	1	0	108.8	31.6	37.6471	0					0.02728	0.921012	0+
247	0	35	male	70	1.73	23.38	0	1	0	112.7	51.3	37.6558	0					0.027178	0.848628	0+
126	0	49	male	75	1.65	27.54	0	0	1	102.9	38.41	37.7961	0					2.01077	0.988591	0+
10	0	21	male	80	1.88	22.63	0	0	1	133.7	52.27	37.8282	0					0.010428	0.325853	0+
142	0	55	male	67	1.7	23.18	0	1	0	109.7	53.59	37.9585	1	1	1	1	1	0.008496	0.960311	0+
154	0	57	male	74	1.73	24.72	1	0	1	114.1	37.61	38.1236	0					0.00721	0.830791	0+
301	0	55	male	68	1.75	22.2	1	1	0	116.8	47.32	38.1388	0					2.00695	0.983365	0+
287	0	57	male	75	1.72	25.35	1	1	0	113.3	30.76	38.2977	0					2.00639	0.954528	0+
78	0	33	male	72	1.73	24.05	0	1	1	115.5	48.36	38.5913	0					6.292	0.941322	0+
140	0	54	male	71.5	1.66	25.94	1	1	0	106.7	37.52	38.7211	0					3.252	0.939729	0+
66	0	31	male	85	1.73	28.4	0	0	1	115.9	43.84	38.725	0					0.0293	0.680546	0+
110	0	42	male	70	1.7	24.22	1	0	1	113.5	44.61	39.2734	0					2.1247	0.996545	0+
87	0	35	male	76	1.7	26.29	0	0	0	113.7	48.8	39.3426	0					2.26174	0.961979	0+
6	0	19	female	64	1.64	23.79	0	0	1	106.3	36.7	39.5226	0					2.25792	0.969111	0+
59	0	30	male	77	1.8	23.76	0	0	1	129.4	49.25	39.9383	0					0.25716	0.948141	0+
111	0	43	male	80	1.71	27.35	0	0	0	116.9	56.99	39.9781	0					0.22494	0.912706	0+
165	0	60	male	75	1.68	26.57	1	0	1	114.1	46.06	40.4266	0					2.2181	0.911934	0+
107	0	42	male	68.5	1.69	23.98	0	0	0	116.6	44.8	40.8249	0					0.18538	0.732657	0+
202	0	69	male	64	1.65	23.5	0	0	0	111.5	39.2	40.955	0					2.15536	0.85646	0+
54	0	29	male	60	1.6	23.43	0	0	0	108.5	52.22	42.3828	0					0.141	0.801986	0+
132	0	51	male	105	1.8	32.4	0	1	1	139.4	36.2	43.0247	0					20.126	0.986417	0+
199	0	68	male	70	1.71	23.93	1	1	0	131.8	35.57	45.0737	0					6.00746	0.998439	0+
169	0	60	male	64	1.68	22.67	0	0	0	132.1	42.93	46.8041	0					20.0045	0.999329	0+
15	0	23	male	87	1.83	25.97	0	0	1	177	50.98	52.8532	0					2.00022	0.984072	0+
